# Supplementary material for: Long-term persistence and function of hematopoietic stem cell-derived chimeric antigen receptor T cells in a nonhuman primate model of HIV/AIDS
Source: PubMed Central journal article supplement (PMC5746250; doi:10.1371/journal.ppat.1006753), 2017-12-28
Supplement: ppat.1006753.s001.pdf [file ppat.1006753.s001.pdf]

## Supplementary Figures

### Supplementary Figure 1

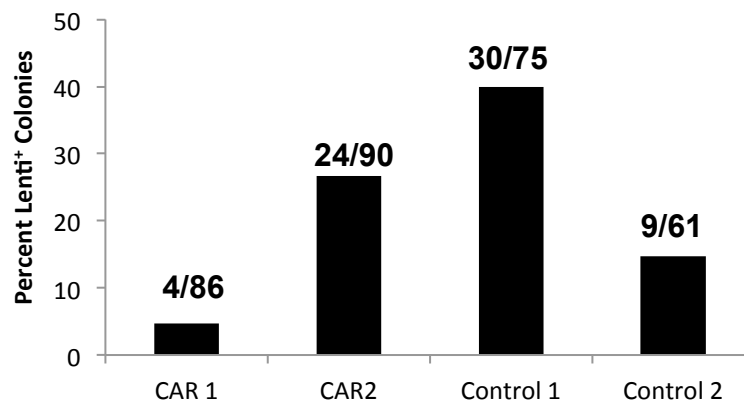

**Supplementary Figure 1. Lentiviral gene marking in transduced HSPC infusion products.**

Four male juvenile pigtailed macaques were transplanted with autologous HSPCs transduced with lentiviruses expressing C46CD4CAR (CAR) or C46CD4CAR $\Delta$ Zeta (Control). Colony forming assays were plated from a small aliquot of transduced CD34<sup>+</sup> cells that were infused into each autologous recipient. "Percent Lenti+ Colonies" represents the number of lentivirus-positive colonies divided by actin-positive colonies, measured by PCR; numerical values are displayed over each bar.
