# Supplementary material for: Long-term persistence and function of hematopoietic stem cell-derived chimeric antigen receptor T cells in a nonhuman primate model of HIV/AIDS
Source: PubMed Central journal article supplement (PMC5746250; doi:10.1371/journal.ppat.1006753), 2017-12-28
Supplement: ppat.1006753.s002.pdf [file ppat.1006753.s002.pdf]

## Supplementary Figure 2

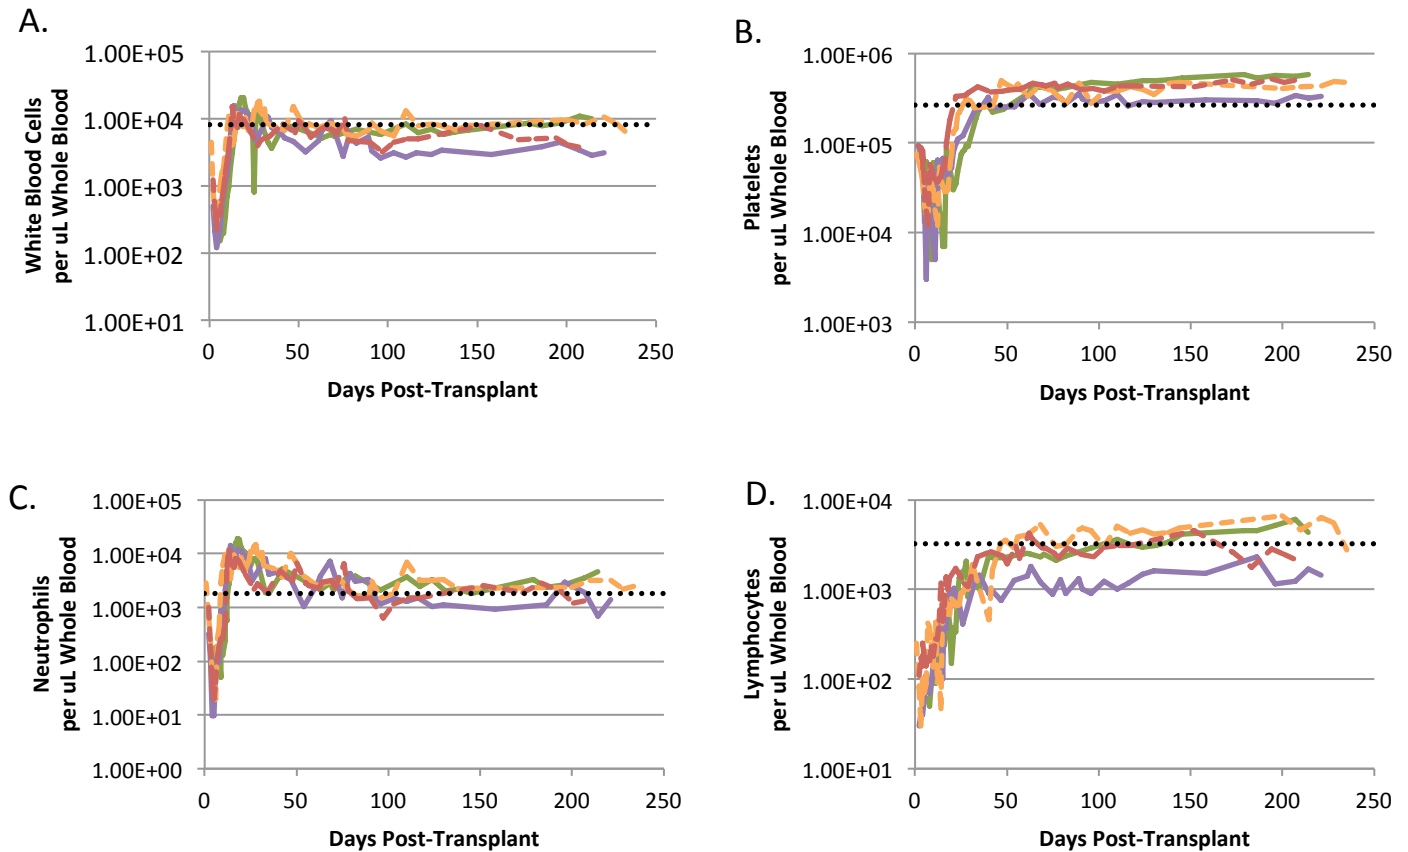

**Supplementary Figure 2. Hematopoietic Recovery Following CD4 CAR-HSPC Transplant.** Four male juvenile pigtailed macaques were transplanted with autologous HSPCs transduced with lentiviruses expressing either CD4 chimeric antigen receptor (C46CD4CAR, green and purple lines) or a control CD4 CAR that lacked the CD3 $\zeta$  signaling chain (C46CD4CAR $\Delta$ zeta, orange and red dashed lines). **(A)** Total white blood cell, **(B)** Platelet, **(C)** Neutrophil, and **(D)** Lymphocyte values were measured by automated differential count. Dotted lines represent normal values.
