# Supplementary material for: Long-term persistence and function of hematopoietic stem cell-derived chimeric antigen receptor T cells in a nonhuman primate model of HIV/AIDS
Source: PubMed Central journal article supplement (PMC5746250; doi:10.1371/journal.ppat.1006753), 2017-12-28
Supplement: ppat.1006753.s003.pdf [file ppat.1006753.s003.pdf]

# Supplementary Figure 3

A.

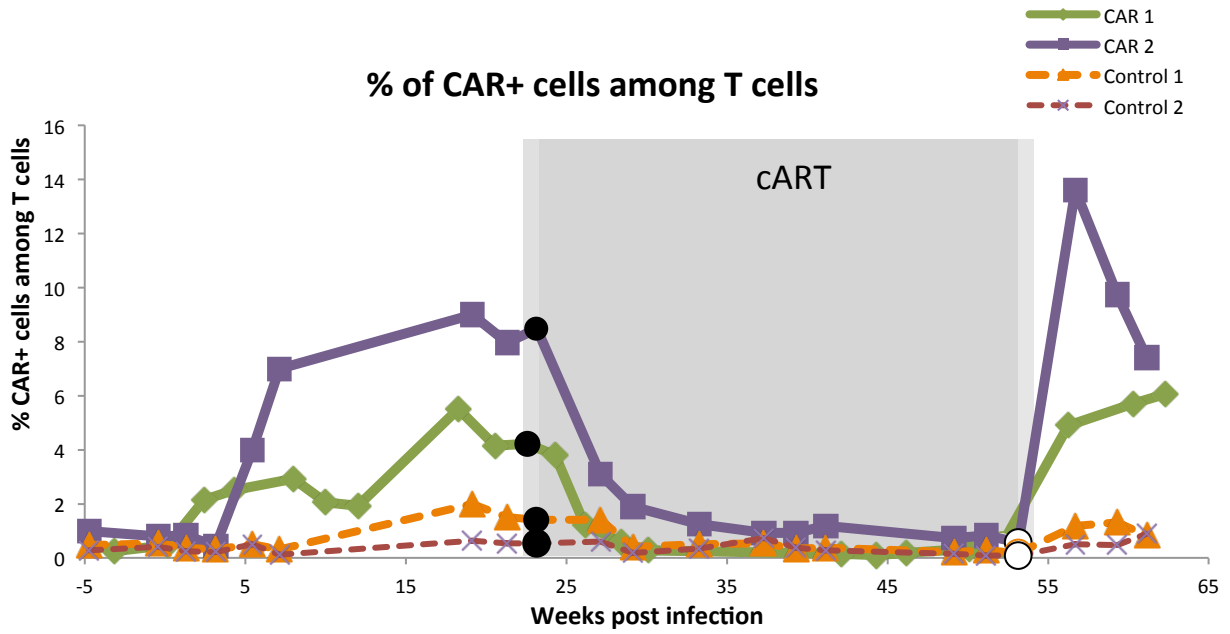

B.

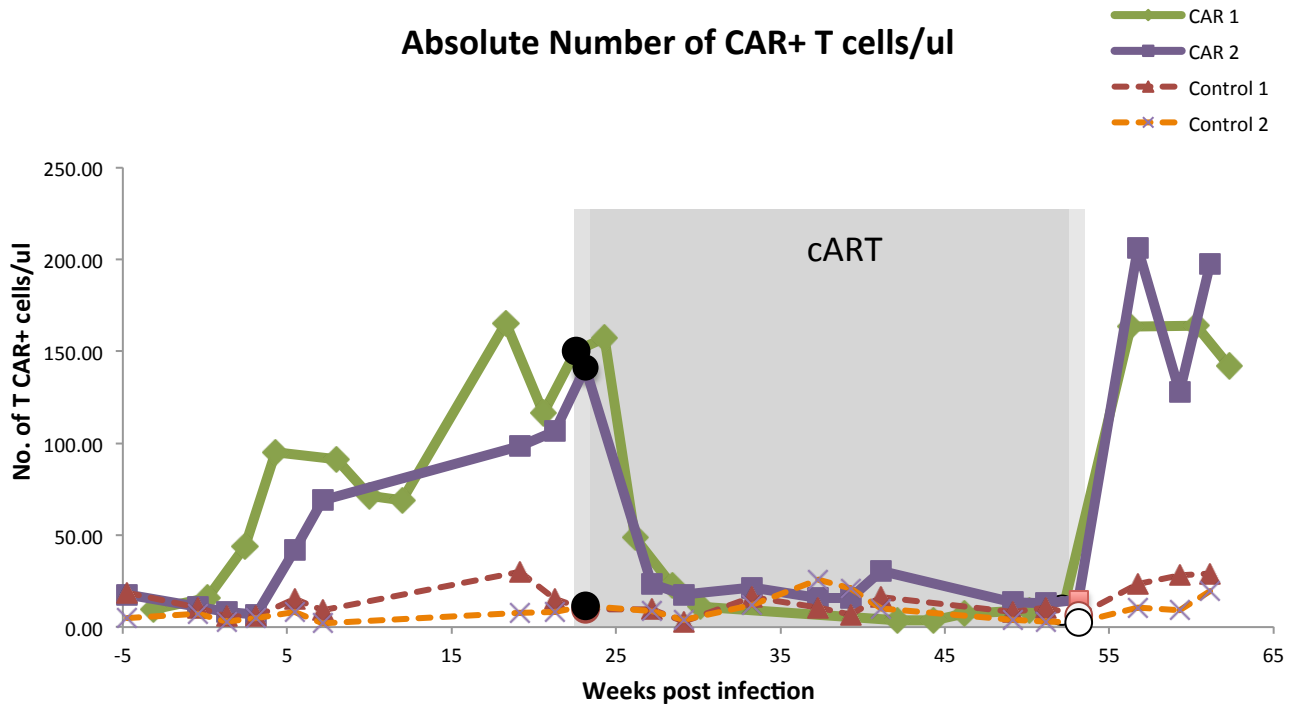

**Supplementary Figure 3: C46CD4CAR cells expand in response to SHIV antigen *in vivo*.** (A) % of huCD4+ cells among T cells and (B) Absolute number of huCD4+T cells per ul of peripheral blood. Closed circles and open circles indicate beginning and end of cART, respectively.
