# Supplementary material for: Long-term persistence and function of hematopoietic stem cell-derived chimeric antigen receptor T cells in a nonhuman primate model of HIV/AIDS
Source: PubMed Central journal article supplement (PMC5746250; doi:10.1371/journal.ppat.1006753), 2017-12-28
Supplement: ppat.1006753.s005.pdf [file ppat.1006753.s005.pdf]

# Supplementary Figure 5

A.

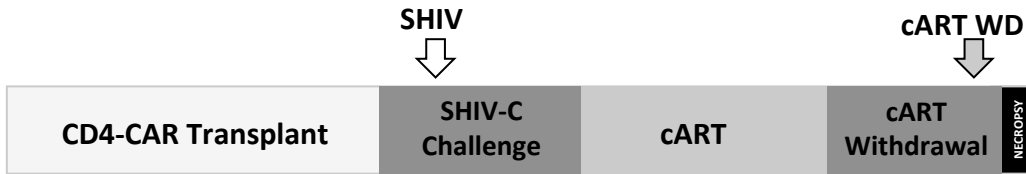

B.

During primary SHIV infection prior to cART treatment

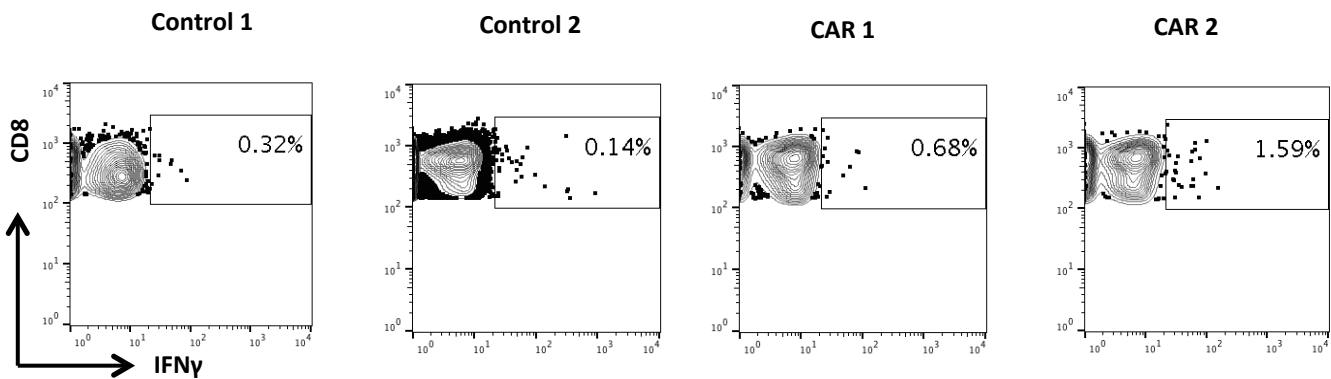

C.

cART withdrawal

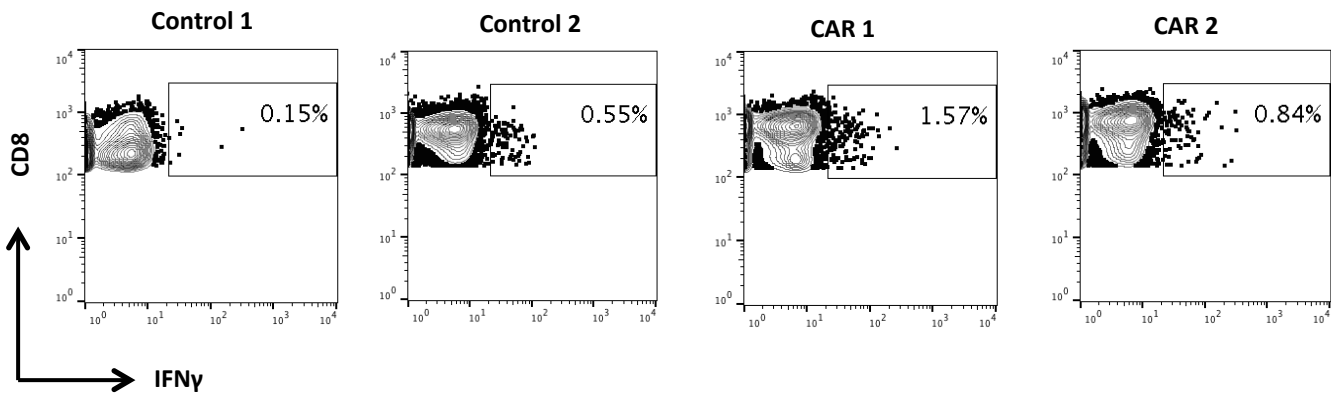

**Supplementary Figure 5: Natural anti-SHIV T cell response Responses in Transplanted Animals Following SHIV Challenge and after cART withdrawal. (A)** Study schematic indicating time points from which PBMCs were collected for *ex vivo* cytokine assay: unsuppressed primary infection (white arrow) and following withdrawal of cART (gray arrow). Cryopreserved PBMCs were thawed from CAR and control animals during untreated SHIV infection **(B)** and after cART withdrawal **(C)** were stimulated with SIVmac peptide pool overnight. Expression of intracellular IFN $\gamma$  was measured after 6 hours of additional GolgiPlug treatment.
