# Supplementary material for: Long-term persistence and function of hematopoietic stem cell-derived chimeric antigen receptor T cells in a nonhuman primate model of HIV/AIDS
Source: PubMed Central journal article supplement (PMC5746250; doi:10.1371/journal.ppat.1006753), 2017-12-28
Supplement: ppat.1006753.s007.pdf [file ppat.1006753.s007.pdf]

# Supplementary Figure 7

A.

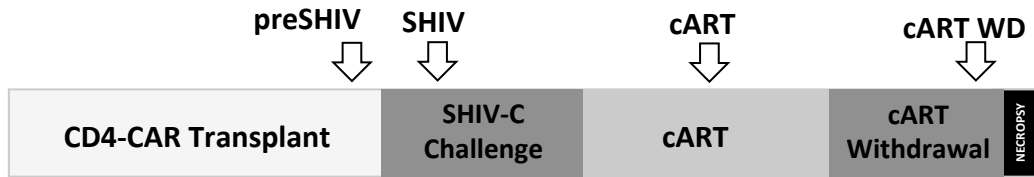

B.

|           |         | Cytokines (*pg/ml) Detection range: 2.44-10,000g/ml |              |      |      |       |              |               |          |              |
|-----------|---------|-----------------------------------------------------|--------------|------|------|-------|--------------|---------------|----------|--------------|
|           |         | IFN $\gamma$                                        | IL-1 $\beta$ | IL-2 | IL-6 | MCP-1 | MIP1 $\beta$ | MIP1 $\alpha$ | sCD40L   | TNF $\alpha$ |
| CAR 1     | PreSHIV | N.D                                                 | N.D          | N.D  | N.D  | 377.6 | 46.88        | N.D           | 1059.0   | 14.7         |
|           | SHIV    | N.D                                                 | N.D          | N.D  | N.D  | 556.3 | 33.88        | N.D           | 287.9    | 4.6          |
|           | cART    | N.D                                                 | N.D          | N.D  | N.D  | 533.8 | 38.06        | N.D           | 117.9    | 9.8          |
|           | cART WD | N.D                                                 | N.D          | N.D  | N.D  | 306.1 | 40.83        | N.D           | 3.9      | N.D          |
| CAR 2     | PreSHIV | N.D                                                 | N.D          | N.D  | N.D  | 376.5 | N.D          | N.D           | 45710.5  | 12.2         |
|           | SHIV    | N.D                                                 | N.D          | 9.1  | N.D  | 213.3 | N.D          | N.D           | 96.0     | 21.7         |
|           | cART    | N.D                                                 | N.D          | N.D  | N.D  | 277.6 | N.D          | N.D           | 331.0    | N.D          |
|           | cART WD | N.D                                                 | N.D          | 49.2 | N.D  | 357.9 | 53.155       | 23.31         | 2971.6   | 49.82        |
| Control 1 | PreSHIV | N.D                                                 | N.D          | N.D  | N.D  | 259.5 | N.D          | N.D           | 104060.2 | 32.93        |
|           | SHIV    | N.D                                                 | N.D          | N.D  | N.D  | 288.8 | N.D          | N.D           | 918676.7 | 19.39        |
|           | cART    | N.D                                                 | N.D          | N.D  | N.D  | 254.0 | N.D          | N.D           | 76.2     | N.D          |
|           | cART WD | N.D                                                 | N.D          | N.D  | N.D  | 255.8 | N.D          | N.D           | 24390.0  | 14.67        |
| Control 2 | PreSHIV | N.D                                                 | N.D          | 9.1  | N.D  | 359.7 | 73.08        | N.D           | 23705.2  | 9.78         |
|           | SHIV    | N.D                                                 | N.D          | 50.6 | N.D  | 227.2 | 38.185       | 26.91         | 7523.9   | 70.73        |
|           | cART    | N.D                                                 | N.D          | 37.1 | N.D  | 234.8 | 46.72        | N.D           | 280.5    | 39.46        |
|           | cART WD | N.D                                                 | N.D          | N.D  | N.D  | 320.0 | N.D          | N.D           | 115807.0 | 12.23        |

C.

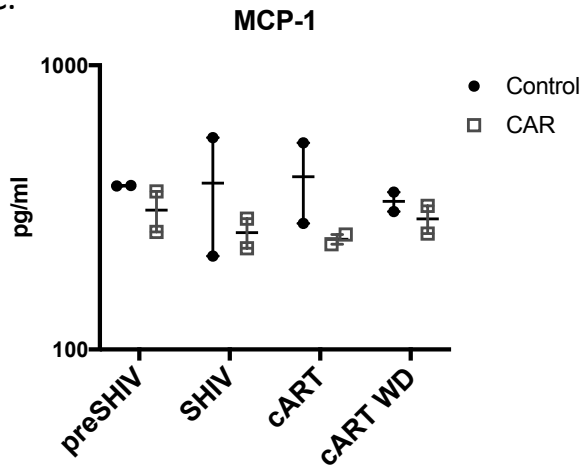

D.

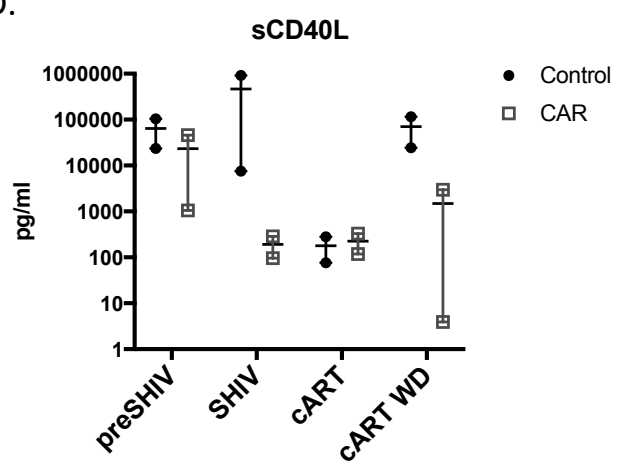

**Supplementary Figure 7: Plasma pro-inflammatory cytokine measurement for control and CAR NHPs prior to SHIV infection, during untreated SHIV infection, cART treatment and after cART withdrawal. (A)** Study schematic indicating time points from which plasma were collected for multiplex cytokine assay. **(B)** 50ul plasma from CAR and control animals were used in NHP multiplex assay for detection of pro-inflammatory cytokines. Cytokines that has level lower than 2.44pg/ml were marked as N.D (non-detectable). **(C)** Summary of plasma MCP-1 level in control and CAR animals. **(D)** Summary of sCD40L level in control and CAR animals.
