# Supplementary material for: Long-term persistence and function of hematopoietic stem cell-derived chimeric antigen receptor T cells in a nonhuman primate model of HIV/AIDS
Source: PubMed Central journal article supplement (PMC5746250; doi:10.1371/journal.ppat.1006753), 2017-12-28
Supplement: ppat.1006753.s009.pdf [file ppat.1006753.s009.pdf]

# Supplementary Figure 9

A.

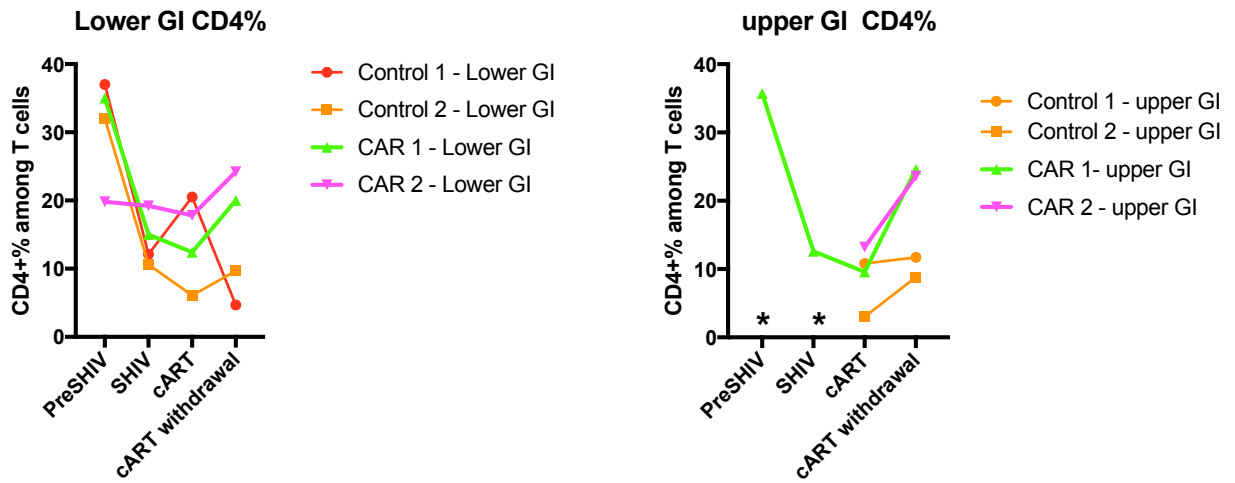

B.

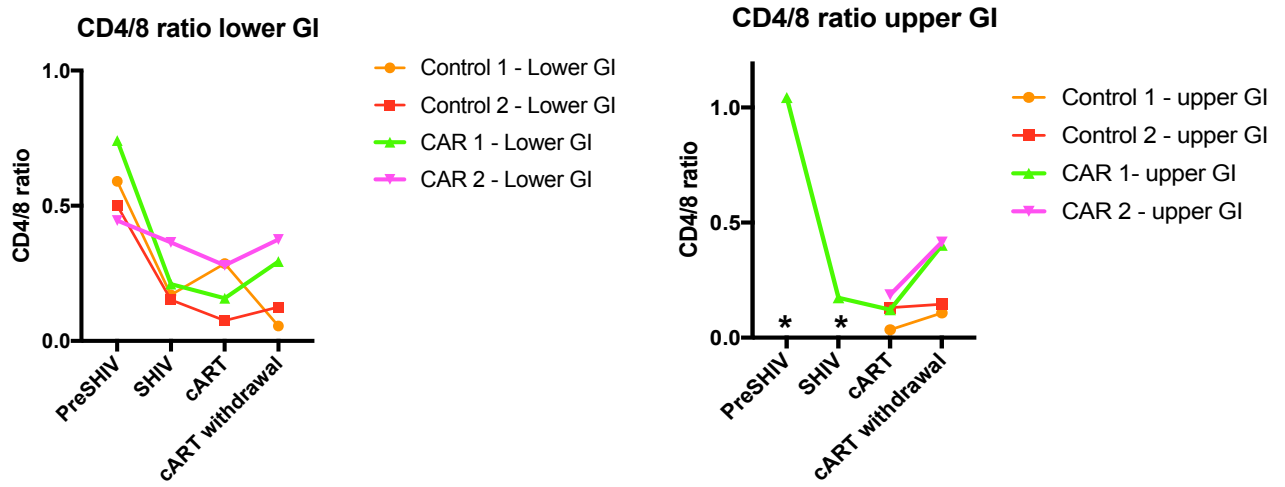

C.

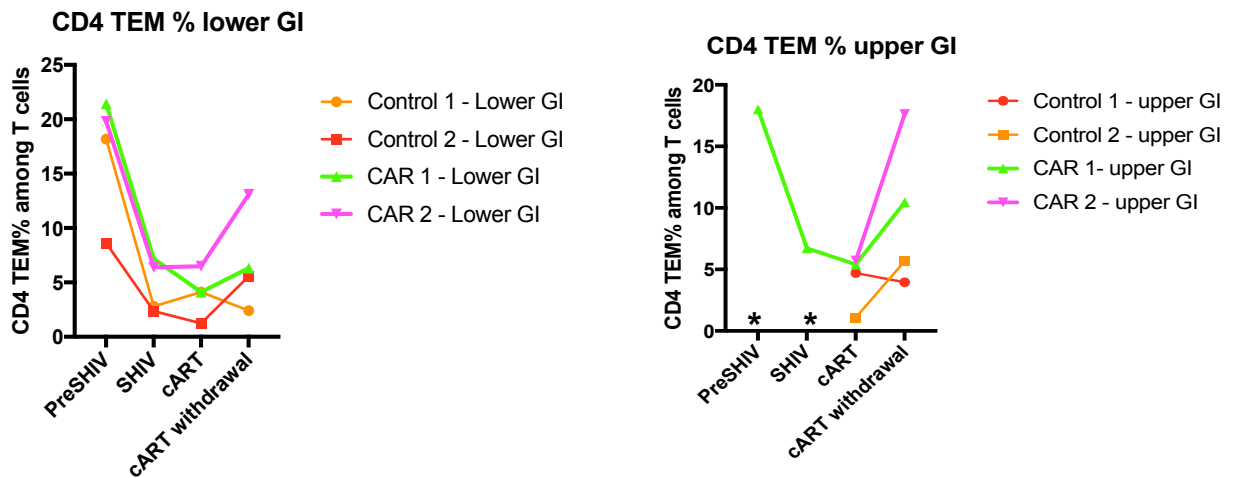

**Supplementary Figure 9: CAR animals showed protection of CD4 T cells in the GI tract. (A)** CD4%, **(B)** CD4/8 ratio and **(C)** CD4 TEM% among CAR and control animals prior to SHIV infection, during primary SHIV infection, during cART treatment and after cART withdrawal. \*Data point not available for control 2, CAR 1 and CAR 2 animals.
