# Supplementary material for: Long-term persistence and function of hematopoietic stem cell-derived chimeric antigen receptor T cells in a nonhuman primate model of HIV/AIDS
Source: PubMed Central journal article supplement (PMC5746250; doi:10.1371/journal.ppat.1006753), 2017-12-28
Supplement: ppat.1006753.s010.pdf [file ppat.1006753.s010.pdf]

# Supplementary Figure 10

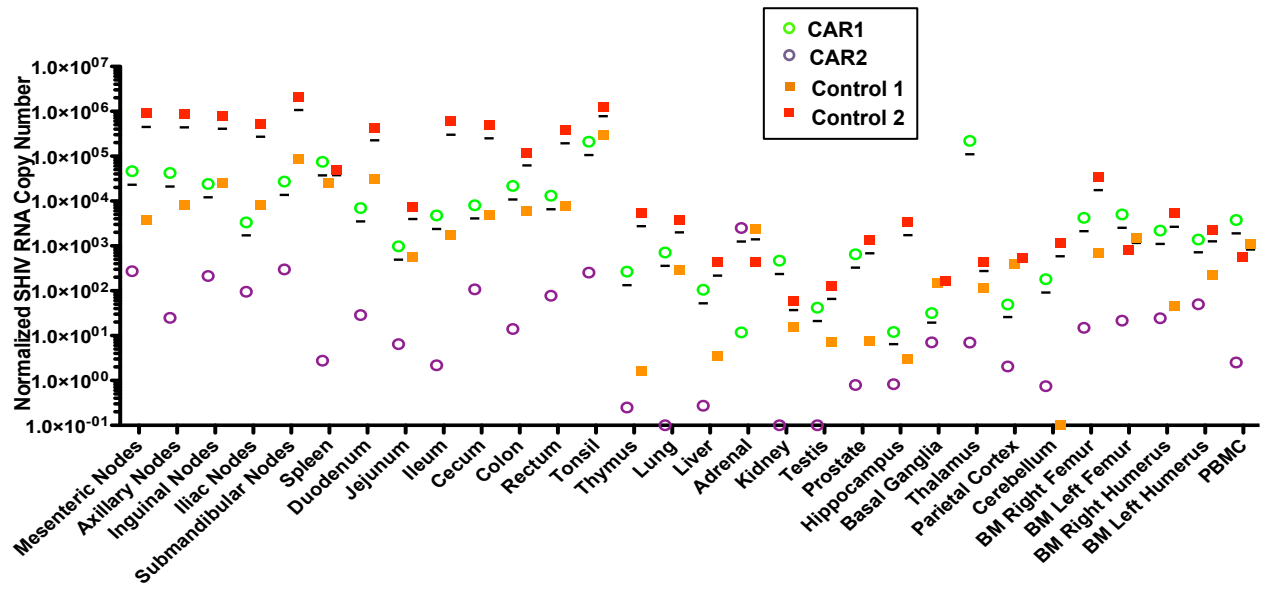

**Supplementary Figure 10: Normalized SHIV RNA copies from multiple tissues collected at necropsy.** Individual values are shown for the indicated CAR and control animals at the indicated tissue sites.
